# Supplementary material
Source: publisher figshare collection journal article supplement (https://tandf.figshare.com/ndownloader/files/15295151)
Supplement: Supplementary file 1 [file 15295151]

**Supplementary data**

New azobenzene-based natural fatty acid liquid crystals with low melting point: synthesis, DFT calculations and binary mixtures

M. Hagar a,b*, H.A. Ahmed a,c*, and O.A. Alhaddadd

1. College of Sciences, Chemistry Department, Yanbu, Taibah University, Saudi Arabia.
2. Faculty of Science, Chemistry Department, Alexandria University, Alexandria, Egypt
3. Faculty of Science, Department of Chemistry, Cairo University, Cairo, Egypt.
4. College of Sciences, Chemistry Department, Madina Monawara, Taibah University, Saudi Arabia.


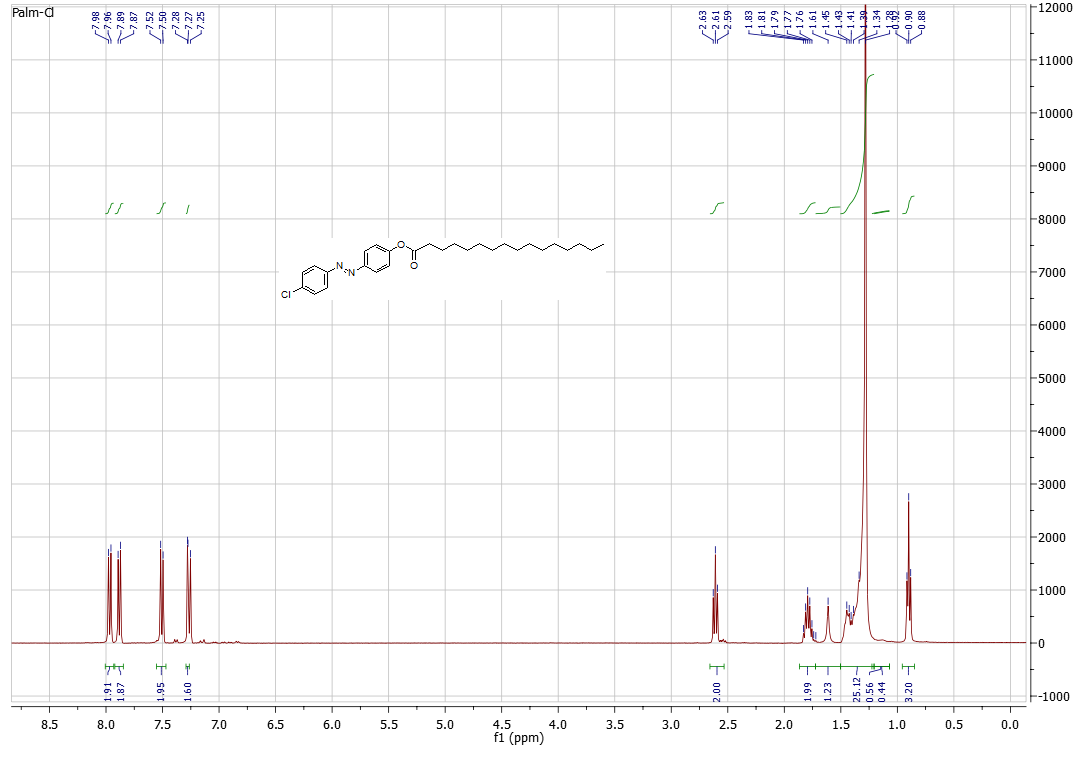


*Figure S1: 1H-NMR of 4-​[2-​(4-​chlorophenyl)​diazenyl]​phenyl hexdecanoate*


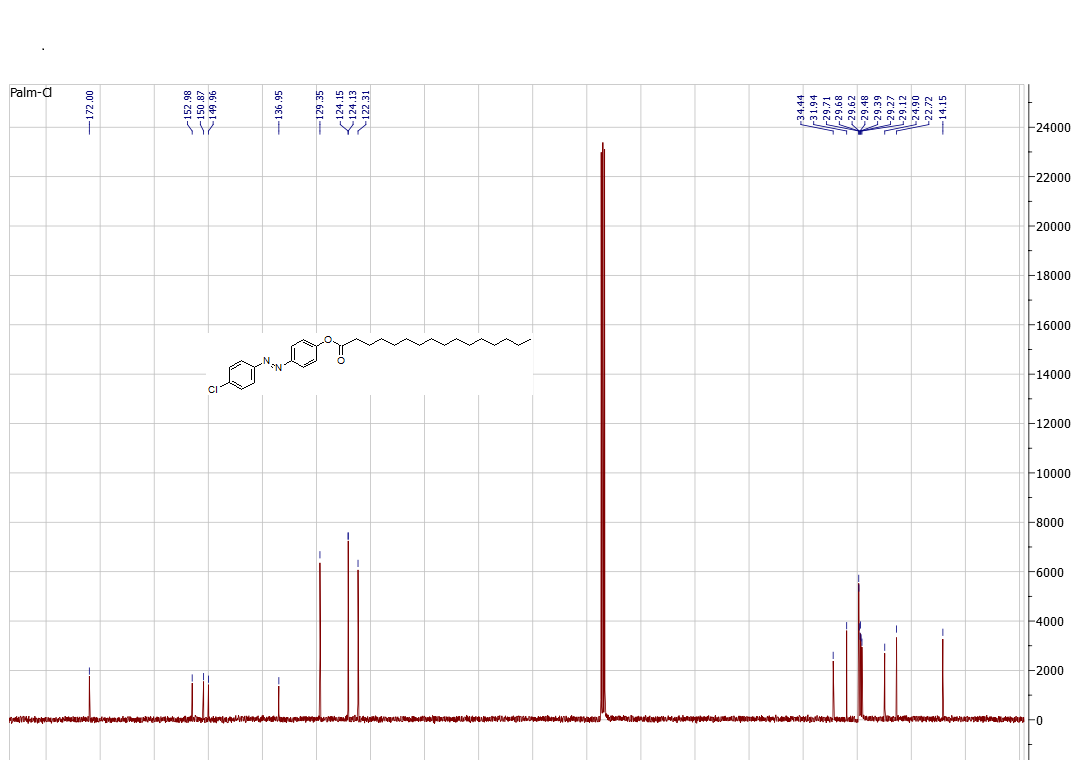


*Figure S2: C13-NMR of 4-​[2-​(4-​chlorophenyl)​diazenyl]​phenyl hexdecanoate*


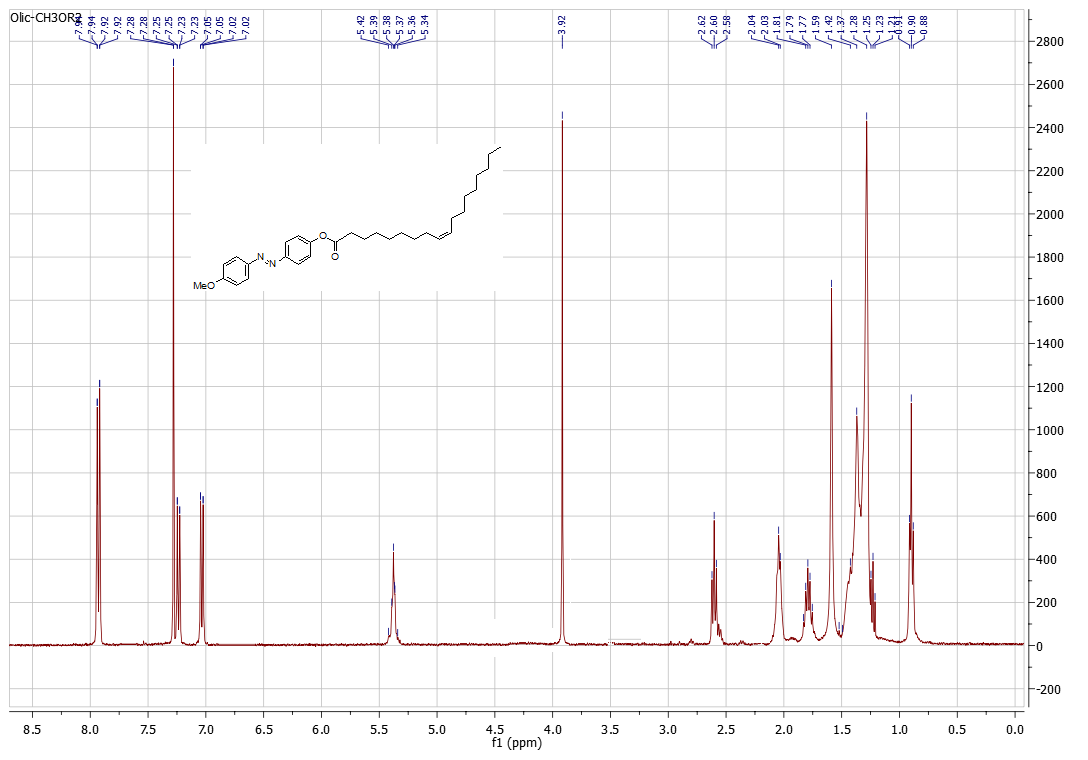


*Figure S3: 1H-NMR of 4-​[2-​(4-​methoxyphenyl)​diazenyl]​phenyl octadeca-9-enoate*


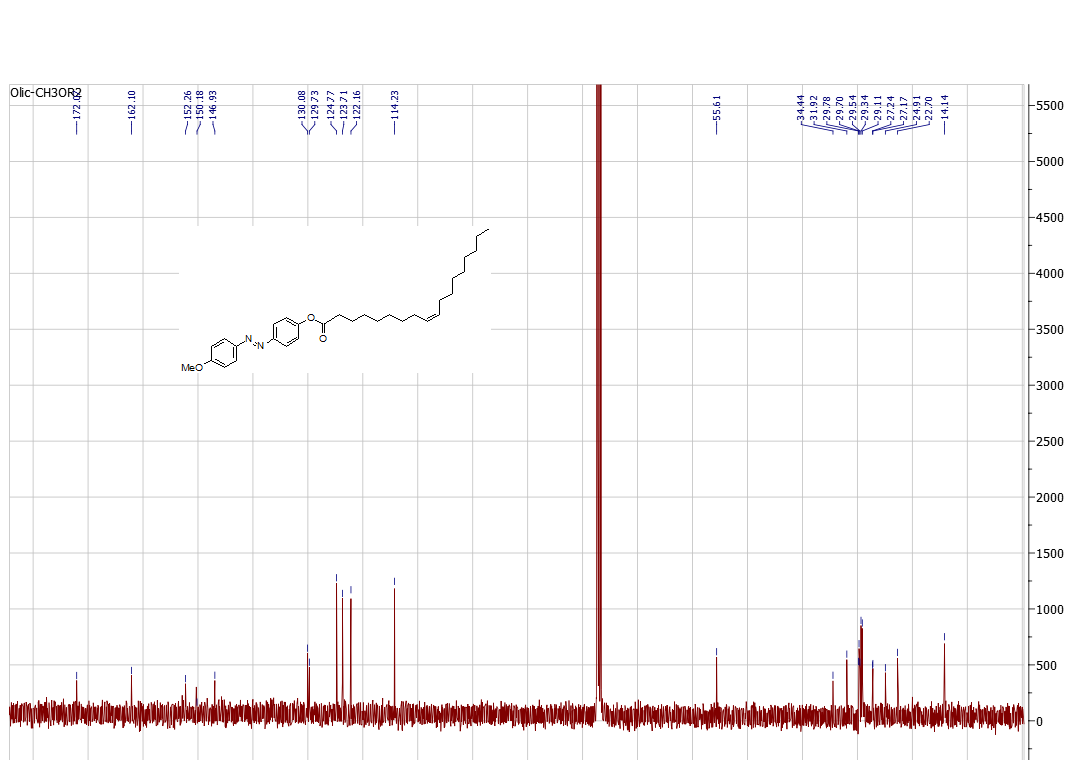


*Figure S4: C13-NMR of 4-​[2-​(4-​methoxyphenyl)​diazenyl]​phenyl octadeca-9-enoate*


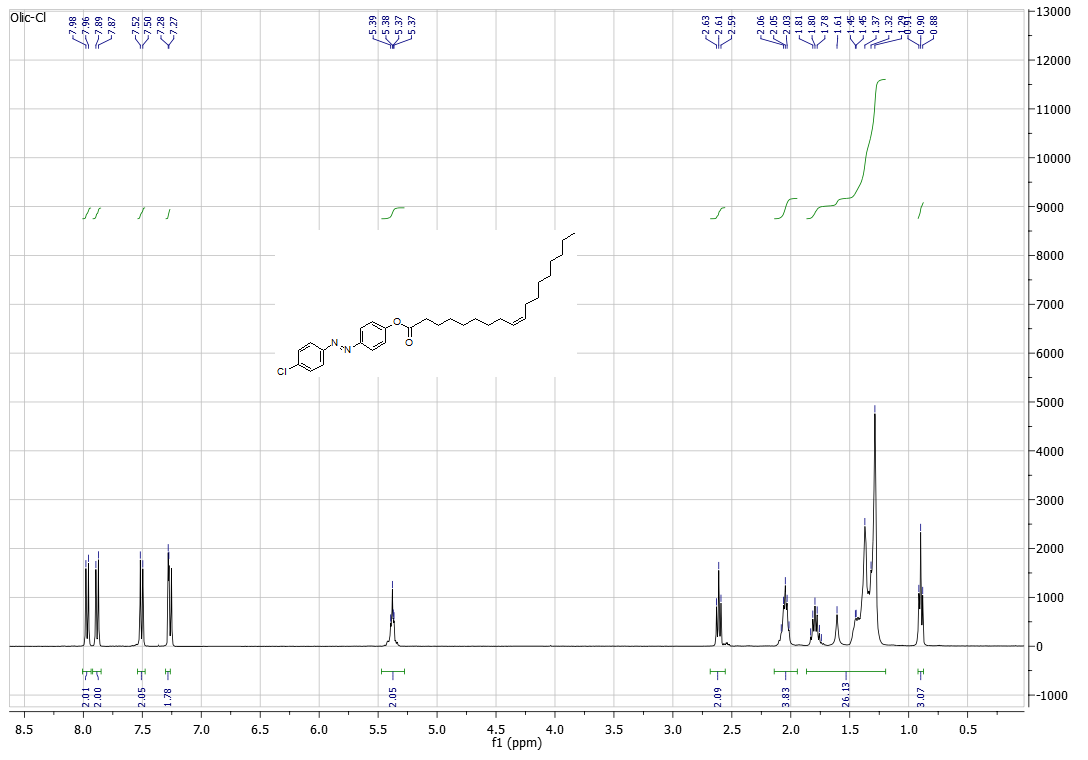


*Figure S5: 1H-NMR of 4-​[2-​(4-​chlorophenyl)​diazenyl]​phenyl octadeca-9-enoate*


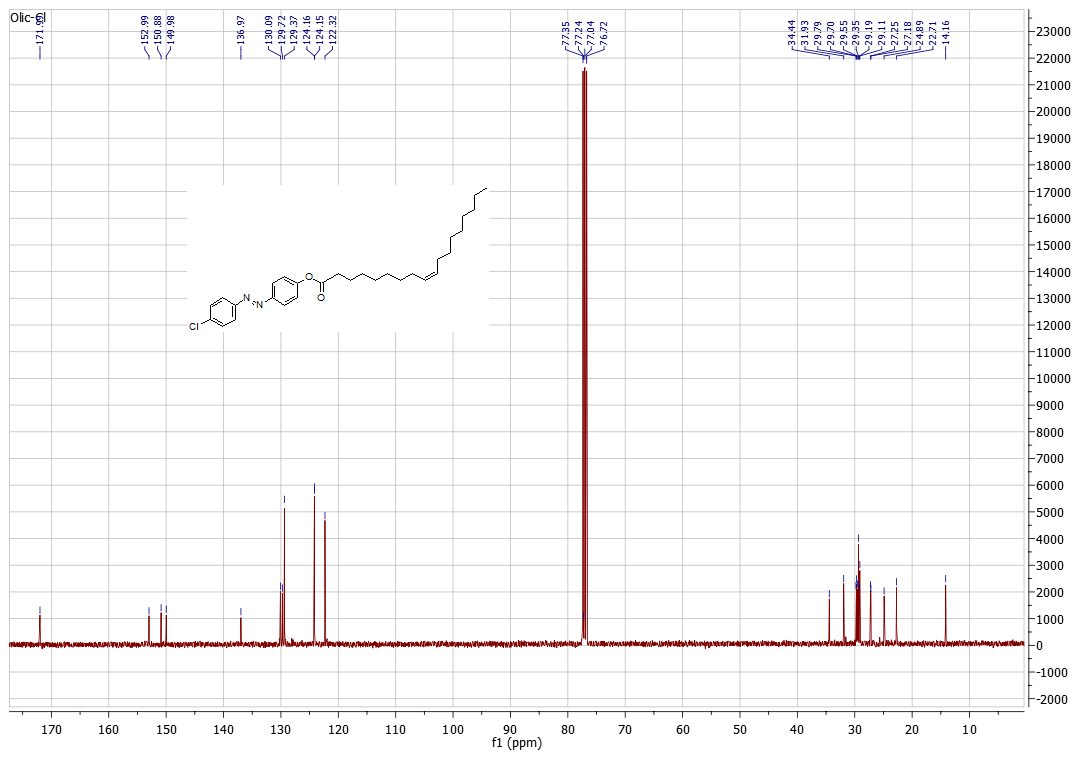


*Figure S6: C13-NMR of 4-​[2-​(4-​chlorophenyl)​diazenyl]​phenyl octadeca-9-enoate*


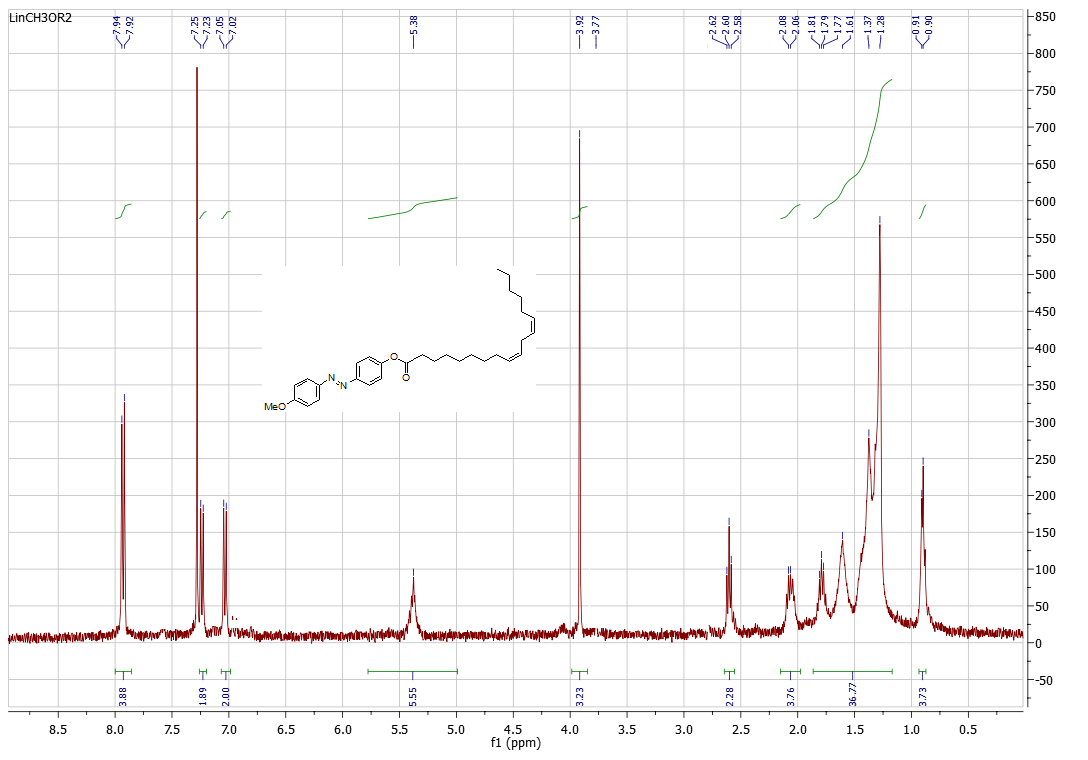


*Figure S7: 1H-NMR of 4-​[2-​(4-​methoxyphenyl)​diazenyl]​phenyl octadeca-9,12-dienoate*


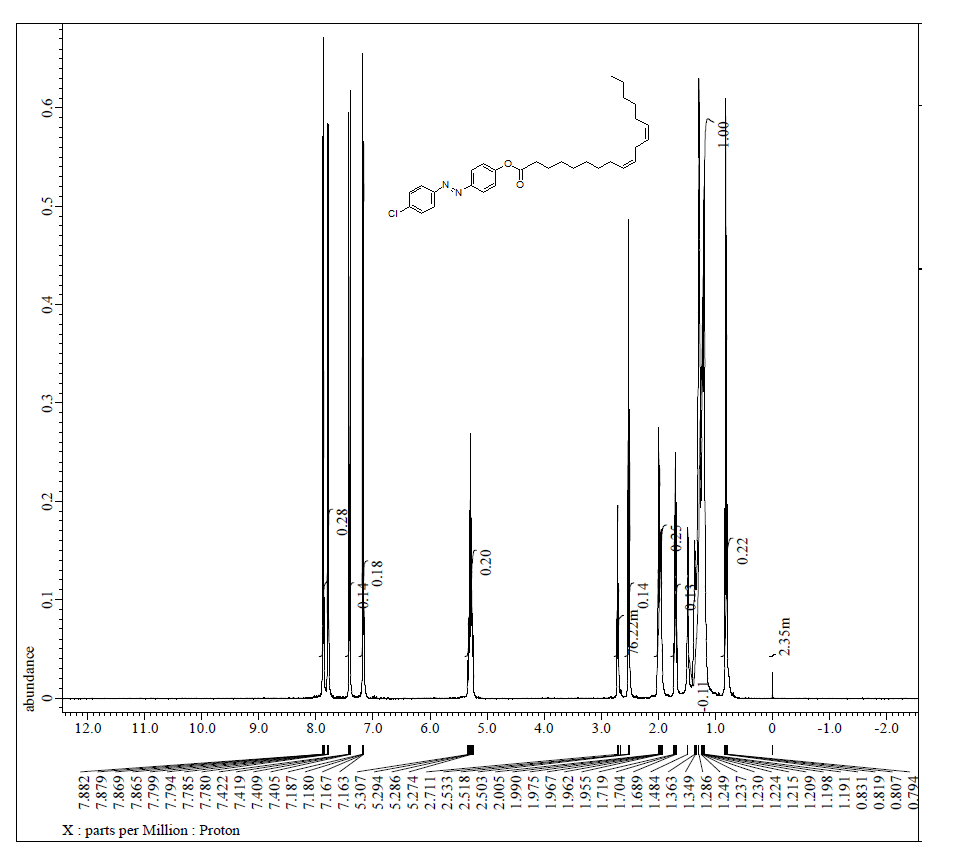


*Figure S8: 1H-NMR of 4-​[2-​(4-​chlorophenyl)​diazenyl]​phenyl octadeca-9,12-dienoate*


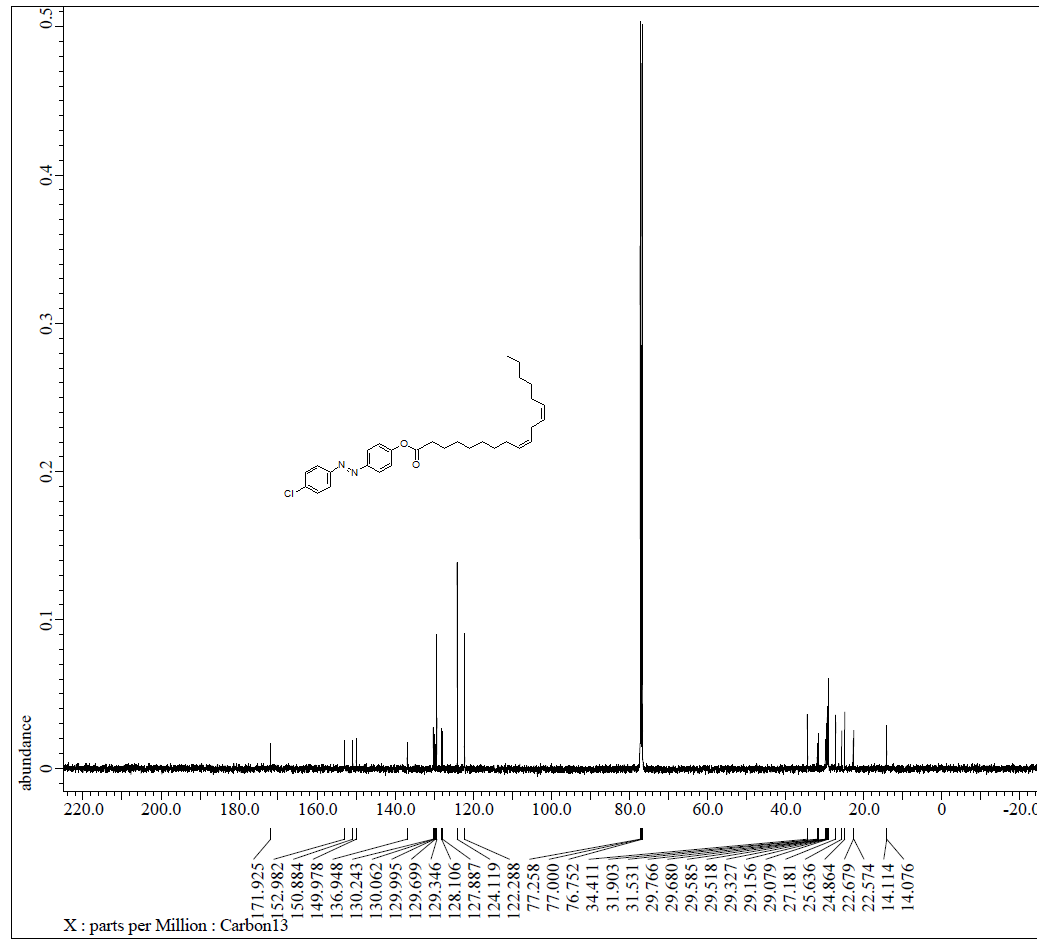


*Figure S9: C13-NMR of 4-​[2-​(4-​chlorophenyl)​diazenyl]​phenyl octadeca-9,12-dienoate*
